# Supplementary material for: Kynurenine induces T cell fat catabolism and has limited suppressive effects in vivo
Source: PubMed Central journal article supplement — eBioMedicine. 2021 Dec 4;74:103734. doi: 10.1016/j.ebiom.2021.103734 (PMC8652007; doi:10.1016/j.ebiom.2021.103734), 2021-12-04
Supplement: mmc1.pdf [file mmc1.pdf]

*Kynurenine induces T cell fat catabolism and has limited suppressive effects in vivo*

Supplemental table S1: Key resource table

| Reagent or Resource                                                               | Source                   | Identifiers                      |
|-----------------------------------------------------------------------------------|--------------------------|----------------------------------|
| <b>Antibodies</b>                                                                 |                          |                                  |
| CD4 Monoclonal Antibody (GK1.5), Alexa Fluor 488                                  | Thermo Fisher Scientific | Cat# 53-0041-82, RRID:AB_469893  |
| CD4 Monoclonal Antibody (GK1.5), APC                                              | Thermo Fisher Scientific | Cat# 17-0041-82, RRID:AB_469320  |
| Rat Anti-CD8a Monoclonal Antibody, PE-Cy7 Conjugated, Clone 53-6.7                | BD Biosciences           | Cat# 552877, RRID:AB_394506      |
| Rat Anti-CD4 Monoclonal Antibody, Pacific Blue Conjugated, Clone RM4-5            | BD Biosciences           | Cat# 558107, RRID:AB_397030      |
| Mouse Anti-CD8 Monoclonal Antibody, Allophycocyanin Conjugated, Clone RPA-T8      | BD Biosciences           | Cat# 555369, RRID:AB_398595      |
| FOXP3 Monoclonal Antibody (FJK-16s), APC                                          | Thermo Fisher Scientific | Cat# 17-5773-80, RRID: AB_469456 |
| Pacific Blue(TM) anti-human CD4 antibody                                          | BioLegend                | Cat# 300521, RRID:AB_493098      |
| Rat Anti-IFN-gamma Monoclonal Antibody, Alexa Fluor 647 Conjugated, Clone XMG1.2  | BD Biosciences           | Cat# 557735, RRID:AB_396843      |
| Rat Anti-CD44 Monoclonal Antibody, Phycoerythrin Conjugated, Clone IM7            | BD Biosciences           | Cat# 553134, RRID:AB_394649      |
| APC-Cy7 Rat Anti-Mouse CD62L antibody                                             | BD Biosciences           | Cat# 560514, RRID:AB_10611861    |
| Rat Anti-CD25 Monoclonal Antibody, Allophycocyanin Conjugated, Clone PC61         | BD Biosciences           | Cat# 557192, RRID:AB_398623      |
| Mouse Anti-CD25 Monoclonal Antibody, PE-Cy7 Conjugated, Clone M-A251              | BD Biosciences           | Cat# 557741, RRID:AB_396847      |
| 7-AAD Staining Solution 2mL antibody                                              | BD Biosciences           | Cat# 559925, RRID:AB_2869266     |
| Annexin V - Apoptosis stain antibody                                              | BD Biosciences           | Cat# 556419, RRID:AB_2665412     |
| PerCP anti-human CD4 antibody                                                     | BioLegend                | Cat# 344624, RRID:AB_2563326     |
| FOXP3 Monoclonal Antibody (PCH101), APC                                           | Thermo Fisher Scientific | Cat# 17-4776-42, RRID:AB_1603280 |
| LEAF™ Purified anti-human CD3 antibody                                            | BioLegend                | Cat# 317304, RRID:AB_571925      |
| Syrian Hamster Anti-CD28 Monoclonal Antibody, Unconjugated, Clone 37.51           | BD Biosciences           | Cat# 553294, RRID:AB_394763      |
| Purified NA/LE Hamster Anti-Mouse CD3e Clone 145-2C11 antibody                    | BD Biosciences           | Cat# 553057, RRID:AB_394590      |
| Dynabeads™ Human T-Activator CD3/CD28                                             | Thermo Fisher Scientific | Cat# 11131D                      |
| Dynabeads™ Mouse T-Activator CD3/CD28                                             | Thermo Fisher Scientific | Cat# 11456D                      |
| <b>Chemicals, Peptides, and Recombinant Proteins</b>                              |                          |                                  |
| LIVE/DEAD Fixable Aqua Dead Cell Stain Kit                                        | Thermo Fisher Scientific | Cat# L34966                      |
| CellTrace CFSE Cell Proliferation Kit                                             | Thermo Fisher Scientific | Cat# C34554                      |
| L-Kynurenine                                                                      | Cayman Chemicals         | Cat# 11305, CAS# 2922-83-0       |
| L-Kynurenine                                                                      | Sigma Aldrich            | Cat# K8625, CAS# 2922-83-0       |
| D-Kynurenine                                                                      | Cayman Chemicals         | Cat# 28254, CAS# 13441-51-5      |
| D-Kynurenine                                                                      | Sigma Aldrich            | Cat# K2380, CAS# 13441-51-5      |
| Kynurenic acid                                                                    | Sigma Aldrich            | Cat# K3375, CAS# 492-27-3        |
| Cell-Tak                                                                          | BD Biosciences           | Cat# 354240                      |
| D-Glucose (U-13C6, 99%)                                                           | Cambridge Laboratories   | Isotope<br>Cat# CLM-1396-PK      |
| L-Glutamine (13C5, 99%)                                                           | Cambridge Laboratories   | Isotope<br>Cat# CLM-1822-H-PK    |
| Palmitic acid (U-13C16, 98%)                                                      | Cambridge Laboratories   | Isotope<br>Cat# CLM-409-PK       |
| Bovine Serum Albumin solution, 30% in saline, fatty acid free, aseptically filled | Sigma Aldrich            | Cat# A9205, CAS# 9048-46-8       |
| D-(+)-Glucose                                                                     | Cayman Chemicals         | Cat# 23733, CAS# 50-99-7         |
| L-Glutamine                                                                       | Cayman Chemicals         | Cat# 23716, CAS# 56-85-9         |

|                                                                            |                                  |                                   |
|----------------------------------------------------------------------------|----------------------------------|-----------------------------------|
| Sodium Palmitate                                                           | Sigma Aldrich                    | Cat# P9767, CAS# 408-35-5         |
| Sodium Oleate                                                              | Sigma Aldrich                    | Cat# O7501, CAS# 143-19-1         |
| 1 Kb Plus DNA Ladder                                                       | Invitrogen                       | Cat# 10787018                     |
| Recombinant Mouse TGF-beta 1                                               | R&D systems                      | Cat# 7666-MB-005                  |
| Human TGF-beta 1                                                           | Peprotech                        | Cat# 100-21                       |
| Recombinant Mouse IL-2, carrier-free                                       | Biologend                        | Cat# 575406                       |
| Interleukin-2, human                                                       | Roche                            | Cat# 11011456001                  |
| Dextran sulphate sodium 36-50 kDa                                          | MP Biomedicals                   | Cat# 160110                       |
| Ionomycin                                                                  | Sigma-Aldrich                    | Cat# 56092-82-1                   |
| Phorbol 12-myristate 13-acetate (PMA)                                      | Sigma-Aldrich                    | Cat# 16561-29-8                   |
| BD GolgiStop                                                               | BD Biosciences                   | Cat# 54724                        |
| <b>Critical Commercial Assays</b>                                          |                                  |                                   |
| L-Kynurenine ELISA kit                                                     | ImmuSmol                         | Cat# BA-E-2200                    |
| Seahorse XF Cell Mito Stress Test Kit                                      | Agilent                          | Cat# 103015-100                   |
| Seahorse XF Glycolysis Stress Test Kit                                     | Agilent                          | Cat# 103020-100                   |
| CD4+CD25+ Regulatory T Cell Isolation Kit, mouse                           | Miltenyi Biotec                  | Cat# 130-091-041                  |
| CD90.2 MicroBeads, mouse (for APC)                                         | Miltenyi Biotec                  | Cat# 130-049-101                  |
| CD8a (Ly-2) MicroBeads, mouse                                              | Miltenyi Biotec                  | Cat# 130-049-401                  |
| CD4 MicroBeads, human antibody                                             | Miltenyi Biotec                  | Cat# 130-045-101, RRID:AB_2889919 |
| CD8 MicroBeads, human antibody                                             | Miltenyi Biotec                  | Cat# 130-045-201, RRID:AB_2889920 |
| BD Cytotfix/Cytoperm™ Kit                                                  | Thermo Fisher Scientific         | Cat# BDB554714                    |
| RNeasy Mini Kit                                                            | Qiagen                           | Cat# 74104                        |
| TaqMan™ Universal PCR Master Mix                                           | Thermo Fisher Scientific         | Cat# 4304437                      |
| <b>Experimental Models: Cell Lines</b>                                     |                                  |                                   |
| U-87 MG, human brain tumour (likely glioblastoma), male                    | American Type Culture Collection | Cat# CRL-1772; RRID:CVCL_0188     |
| B16.F10 mouse melanoma, male                                               | American Type Culture Collection | Cat# CVCL_0159 RRID:CVCL_0159     |
| Ae17 mouse mesothelioma, sOVA, female                                      | (34)                             | RRID:CVCL_LJ85                    |
| <b>Experimental Models: Organisms/Strains</b>                              |                                  |                                   |
| B6.129S7- <i>Rag1<sup>tm1Mom</sup>/J</i> (B6/ <i>Rag1</i> <sup>-/-</sup> ) | The Jackson Laboratory           | RRID:IMSR_JAX:002216              |
| C57BL/6J                                                                   | The Jackson Laboratory           | RRID:IMSR_JAX:000664              |
| BALB/cJ                                                                    | The Jackson Laboratory           | RRID:IMSR_JAX:000651              |
| AhR <sup>-/-</sup>                                                         | (21)                             |                                   |
| B6.PL-Thy1a/CyJ (Thy1.1, CD90.1)                                           | The Jackson Laboratory           | RRID:IMSR_JAX:000406              |
| <b>Oligonucleotides</b>                                                    |                                  |                                   |
| Cyplal                                                                     | Thermo Fisher Scientific         | Cat# Mm00487218_m1                |
| TiPARP                                                                     | Thermo Fisher Scientific         | Cat# Mm00724822_m1                |
| 18S rRNA                                                                   | Thermo Fisher Scientific         | Cat# Hs03003631_g1                |
| <b>Software and Algorithms</b>                                             |                                  |                                   |
| Wave 2.6.1                                                                 | Agilent                          | www.agilent.com                   |
| <b>Other</b>                                                               |                                  |                                   |
| RPMI 1640 Medium                                                           | Thermo Fisher Scientific         | Cat# 11875085                     |
| Foetal Bovine Serum, certified, United States                              | Thermo Fisher Scientific         | Cat# 16000044                     |
| RPMI 1640 medium, no glucose                                               | Thermo Fisher Scientific         | Cat# 11879020                     |
| Foetal Bovine Serum, dialyzed, US origin                                   | Thermo Fisher Scientific         | Cat# 26400044                     |
| Seahorse XF Media & Calibrant                                              | Agilent                          | Cat# 102353-100                   |

**Supplemental Figure S1. Kynurenine effects on T cell function are attributable to cell death.**

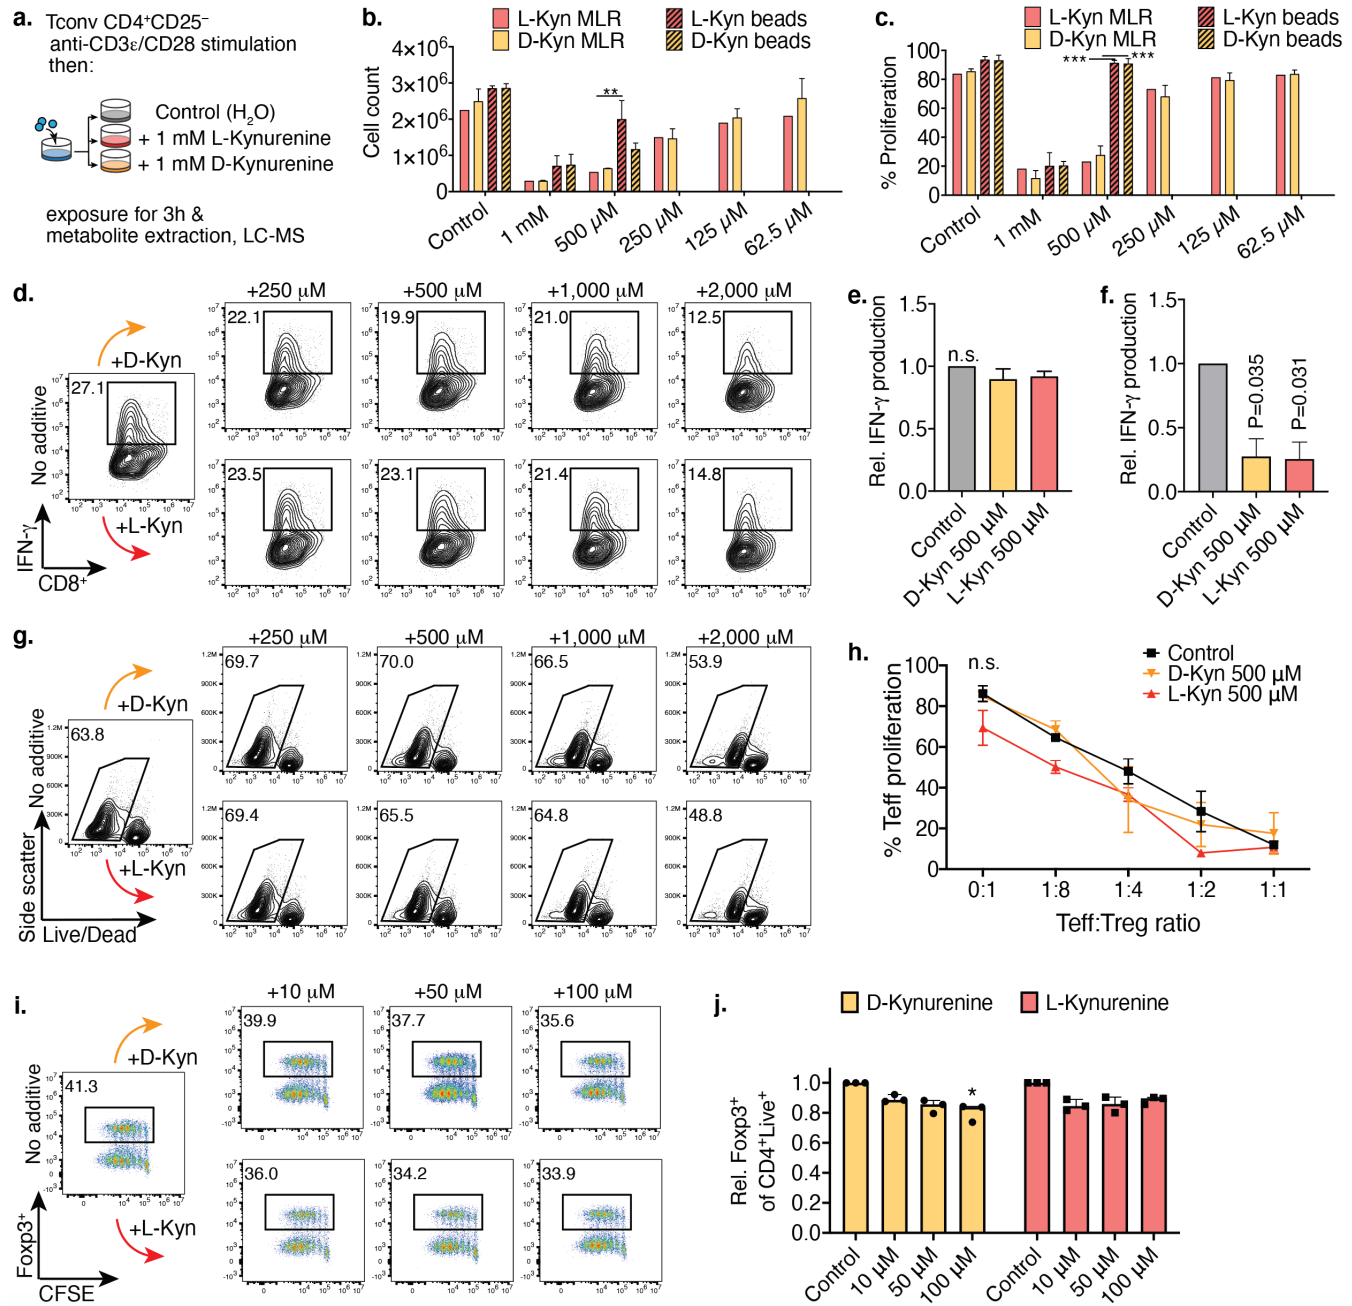

(a) Experimental design to Figure 1B, C as well as Figure 4 & Figure 5. (b, c) Human CD4 T cells in mixed leukocyte reaction (MLR) or with CD3/CD28 bead stimulation, proliferation assessed by cell counting and CFSE-dilution, respectively. Data derived from three (all conditions except D-Kyn beads) or two (D-Kyn beads) independent experiments. Two-way ANOVA comparing MLR with corresponding bead stimulated condition. (d-g) Interferon (IFN)- $\gamma$  production in murine CD8<sup>+</sup> stimulated with CD3 $\epsilon$ /CD28 mAb-coated beads overnight and with PMA/ionomycin for five hours with or without L-/D-kynurenine at the indicated doses (d, e, g) and human T cells stimulated with CD3/CD28 mAb-coated beads for three days (f). (d, g) shows representative flow cytometry of (d) IFN- $\gamma$  production and (G) incremental cell injury with higher L- and D-kynurenine doses, (e, f) cumulative IFN- $\gamma$  production by murine (e) and human (f) T cells at 500  $\mu$ M kynurenine (3/group, Student t-test). (h) CD4<sup>+</sup>CD25<sup>-</sup> T cells were CFSE-labelled and co-stimulated with anti-CD3 $\epsilon$  and irradiated antigen presenting cells and co-cultured with Treg at the indicated ratios. After three days, Treg and Tconv cell viability was assessed using Aqua Life/Dead and effector T cell proliferation measured by CFSE dilution (3/group, area under the curve, Student t-test). (i, j) Murine Tconv cells were CFSE-labelled and co-stimulated and polarized to induce Fopx3 by adding IL-2 and TGF- $\beta$ . After four days, Fopx3 expression in CD4<sup>+</sup> T cells was assessed. D-/L-kynurenine did not increase Fopx3 expression. (I) Representatives and (J) quantitative data normalized to control (Kruskal Wallis test, 3/group). \*, \*\* and \*\*\* indicate p<0.05, p<0.01 and p<0.001, respectively. Data shown as median with IQR or range (b, c, j) or mean with SEM (e, f, h).

### Supplemental Figure S2. Brain kynurenine levels and colitis histology scoring.

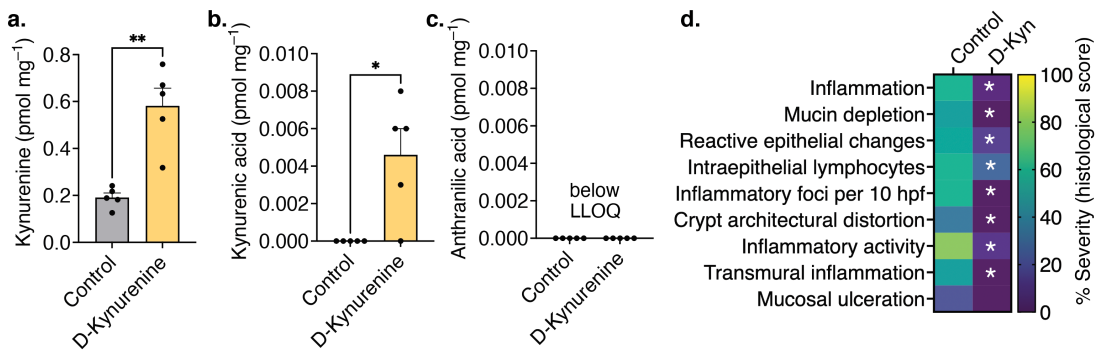

(a-c) C57BL/6J mice were fed D-kynurenine enriched (300 mg/kg/d) or control chow for 10 days (5/group), and brain tissue was snap frozen. Metabolites were extracted and measured by LC-MS/MS. As expected, D-kynurenine (a) and kynurenic acid (b) were increased under D-kynurenine diet. (c) Anthranilic acid was not detected above the lower limit of quantification (LLOQ). (d) Heatmap of blinded histological scoring of colitis data in Figure 2F, G. Data were normalized to a percent scale (Student t-test, 5/group). \* and \*\* indicates p < 0.05 and p < 0.01, respectively.

### Supplemental Figure S3. AhR genotype and phenotype of donor mice.

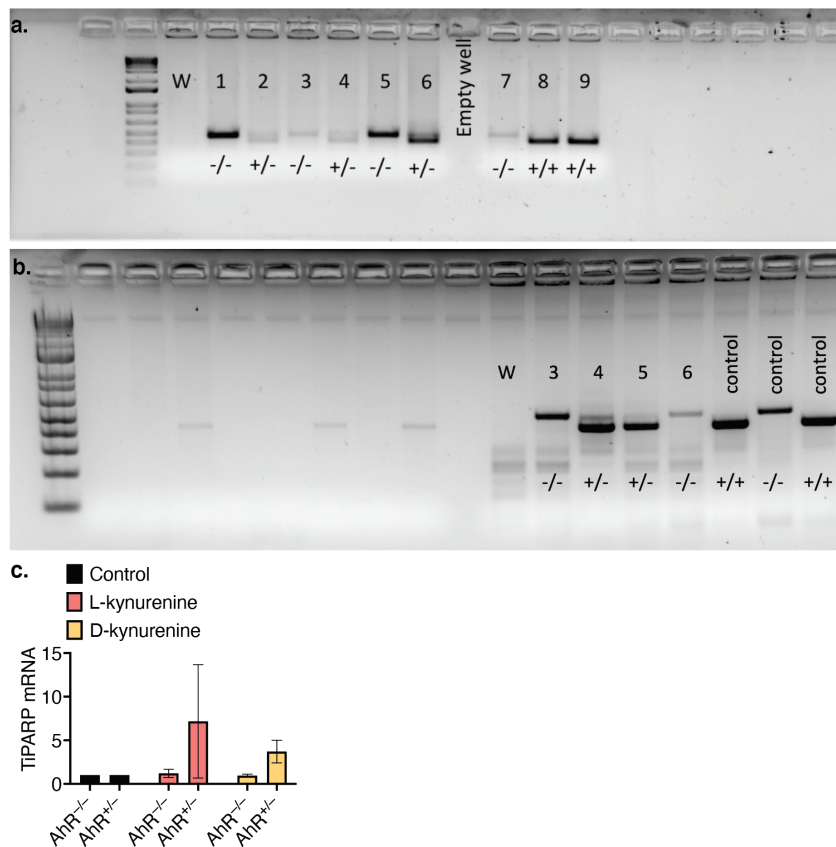

(a, b) Agarose gels with AhR PCR products from RNA extracted from tail tips of spleen-donor mice sent from the University of Florida to confirm AhR genotype in Figure 3 (a) and Figure S3 (b) All data were derived from littermates. (c) AhR-dependent gene expression through qPCR. Murine CD4<sup>+</sup>CD25<sup>-</sup> Tconv from AhR<sup>-/-</sup> and AhR<sup>+/-</sup> littermate T cells were co-stimulated with CD3ε/CD28 mAb-coated beads and exposed to 1 mM L- or D-kynurenine overnight. TiPARP mRNA gene expression was induced through kynurenine if AhR is present. Data derived from two independent experiments and normalized to the control condition without kynurenine. Error bars indicate SEM.

### Supplemental Figure S4. Bioenergetic measurements in kynurenine exposed T cells.

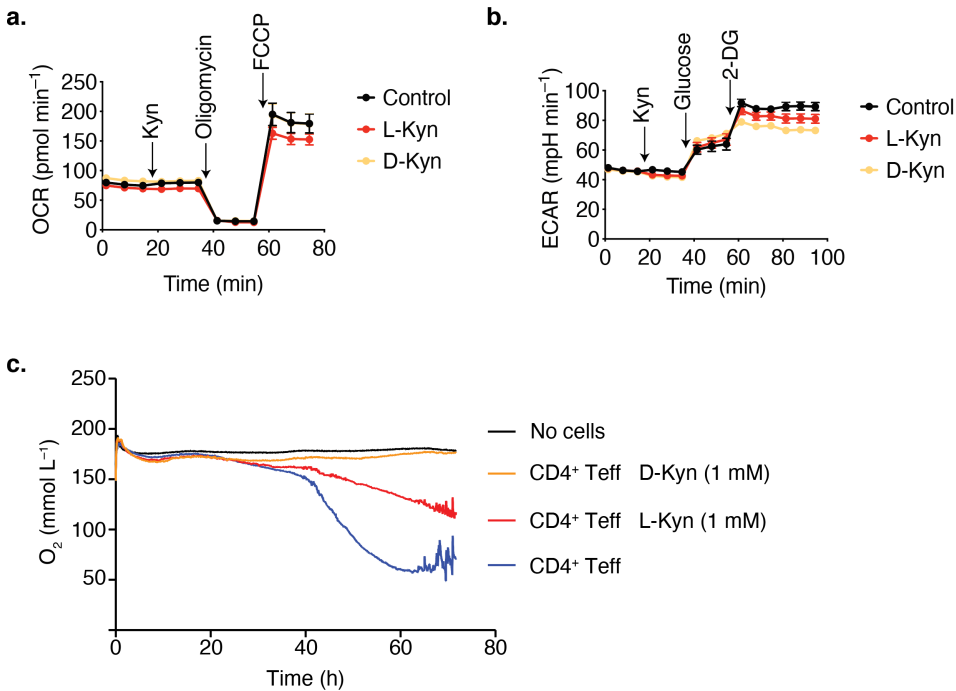

(a, b) Bioenergetic Seahorse assays examining overnight stimulated Tconv for (a) mitochondrial function (corrected for antimycin/rotenone) and (b) glycolytic function. Tconv cells were stimulated with anti-CD3 $\epsilon$ /CD28 beads and 25 U IL-2  $\times$  mL<sup>-1</sup> for 16 hours and the subjected to Seahorse, with L- or D-kynurenine injected into the chamber during the experiment to a final concentration of 1 mM. Data representative for two independent experiments. (c) Cell culture oxygen consumption experiments were performed with SDR SensorDish Reader using stimulated CD4<sup>+</sup> T cells  $\pm$  1 mM D-Kyn or L-Kyn. Abbreviations: 2-DG, 2-Deoxy-D-glycose; FCCP, cyanide-4-[trifluoromethoxy]phenylhydrazone; Kyn, kynurenine; OCR, oxygen consumption rate; ECAR, extracellular acidification rate.

### Supplemental Figure S5. ATP and citrate isocitrate tracing, amino acid and nucleotide ion counts.

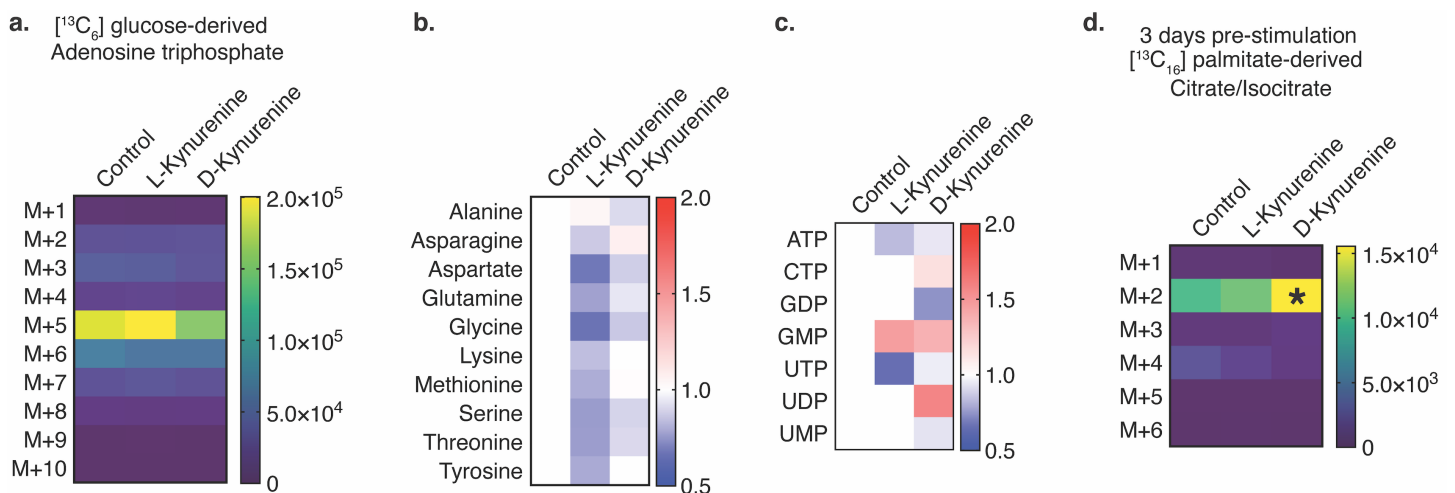

(a-d) Tconv T cells were co-stimulated overnight (a-c) or three days (b) and cultured with [<sup>13</sup>C<sub>6</sub>] D-glucose (a-c) or [<sup>13</sup>C<sub>16</sub>] palmitate (b) for three hours  $\pm$  1 mM L-/D-kynurenine or water control. Metabolites were extracted and analysed for derivative analysis (a, d) or as pooled total ion counts of all isotopologues (b, c). (a, d) Derivative analysis data for glucose derived ATP (a) and palmitate derived citrate/isocitrate (d) were displayed as heatmaps showing total ion counts, with M+1-10 indicating the number of <sup>13</sup>C-atoms per isotopologue. (b, c) Amino acid (b) and nucleotide (c) relative total ion count normalized to the control condition. (a-d) Data pooled from three independent experiments (two-way ANOVA with Benjamini, Krieger and Yekutieli FDR correction, a-d). \* indicates p < 0.05 to control.

**Supplemental Figure S6. Human T cell rescue by serum, albumin, lipids or higher cell number.**

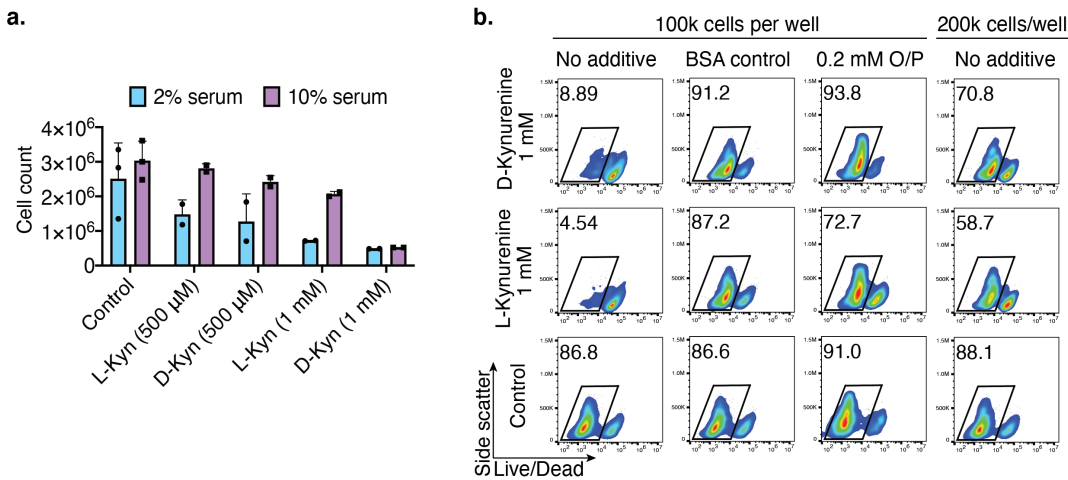

(a) Human CD4<sup>+</sup> T cells were stimulated with or without D-Kyn or L-Kyn at the indicated concentrations in media containing 2% or 10% serum. Data pooled from three independent experiments. (b) Human CD4<sup>+</sup> T cells were co-stimulated ±1 mM L- or D-kynurenine or water control for four days, and cell viability assessed using Aqua Life/Dead staining. Similar to the murine experiments, increasing lipids, but also just lipid free albumin or the amount of T cells per well diminished the apoptosis-inducing effect of kynurenine. Data representative of two independent experiments. Error bars indicate SEM.

**Supplemental Figure S7. Additional tryptophan metabolites in human cancer tissue and kynurenine fed mice.**

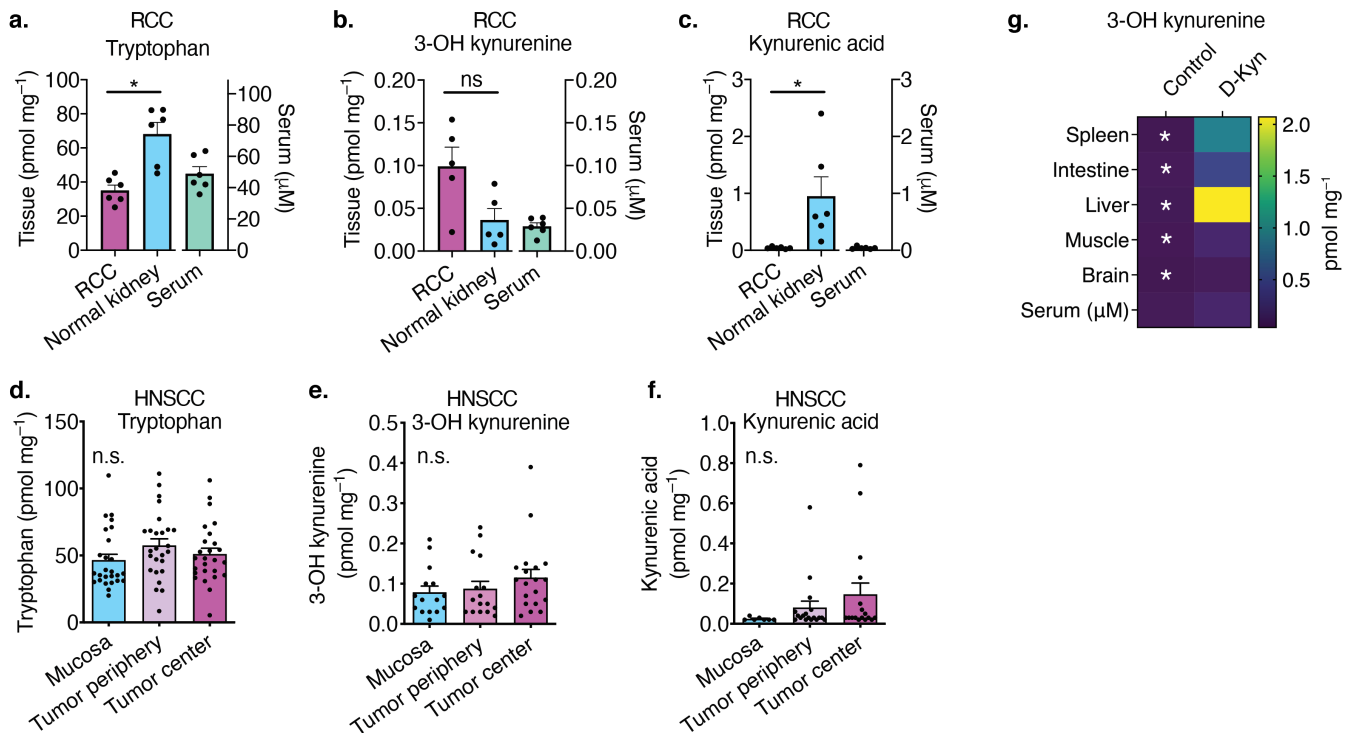

(a-f) Human renal clear cell carcinoma (a-c) and head and neck squamous cell carcinoma (d-f) were frozen in liquid nitrogen, and metabolites were extracted and quantified by LC-MS/MS. Levels of tryptophan (a, d), 3-OH kynurenine (b, e) and kynurenic acid (c, f) were determined in serum, healthy tissue and tumours. Each dot represents an individual patient. (g) C57BL/6J mice were fed D-kynurenine enriched (300 mg/kg/d) or control chow for 10 days (5/group). Serum was obtained from living mice, tissue obtained and snap frozen after euthanasia in rapid succession. Metabolites were extracted and measured by LC-MS/MS. 3-OH kynurenine concentrations are shown as heatmaps. (a-c, g) Student t-test; (d-f) One-way ANOVA. \* indicates  $p < 0.05$ . Error bars indicate SEM.
